# Supplementary material for: Improved SNV discovery in barcode-stratified scRNA-seq alignments
Source: bioRxiv or medRxiv preprint supplement (doi:10.1101/2021.06.12.448184), 2021-06-13
Supplement: Supplementary file [file media-3.pdf]

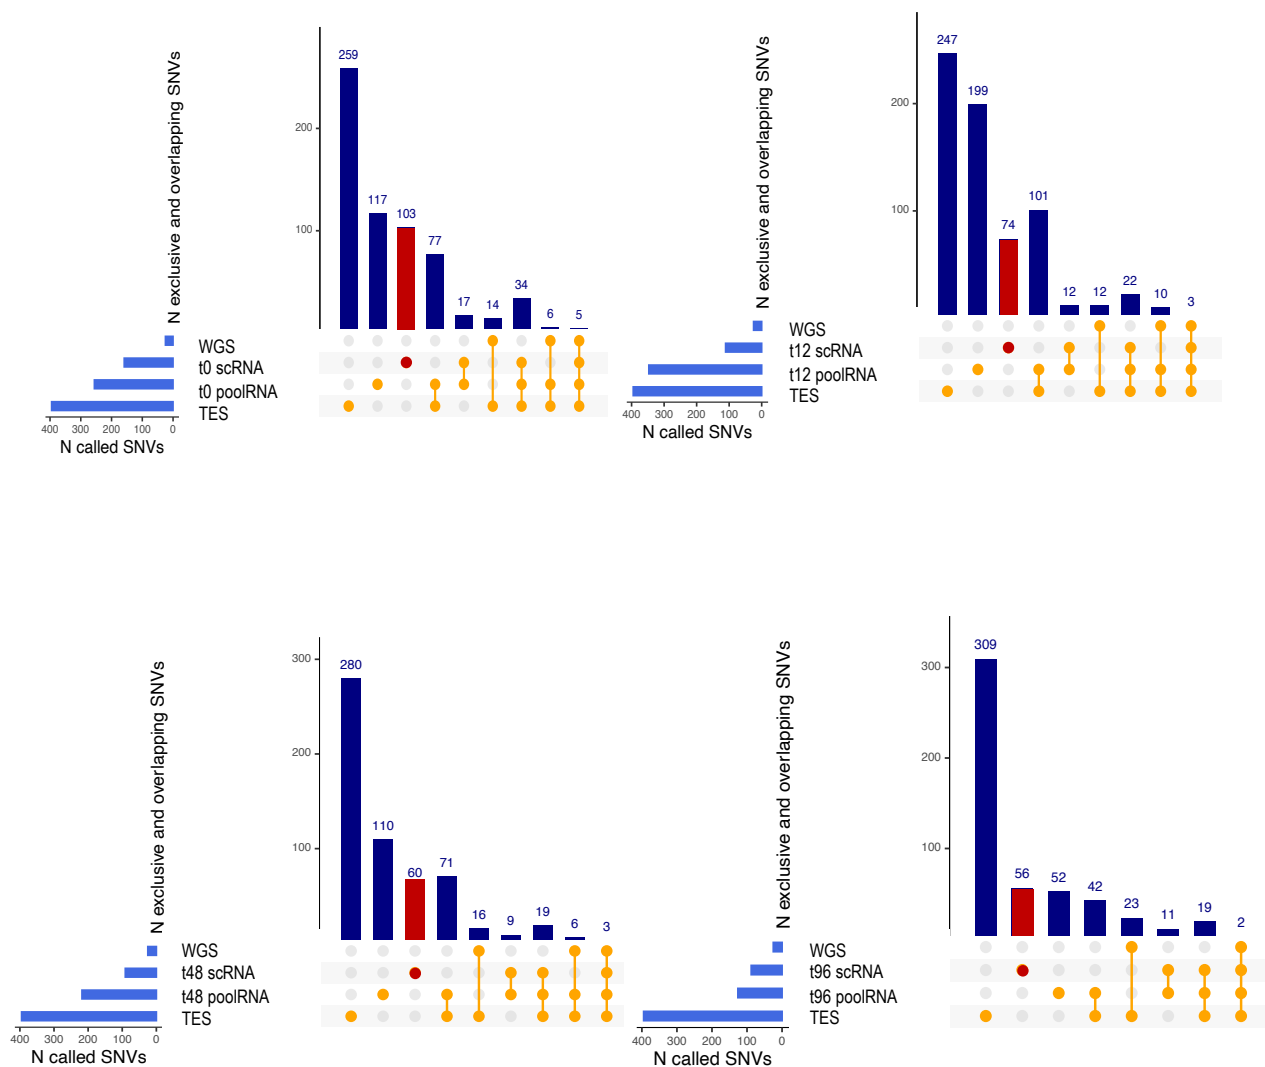

**S\_Figure 1a.** Shared and exclusive SNVs calls across bulk WGS, TES, pooled scRNA-seq and individual cell alignments by GATK in the exons of genes included in the POP. The SNVs called exclusively in the single cell alignments are shown in red.

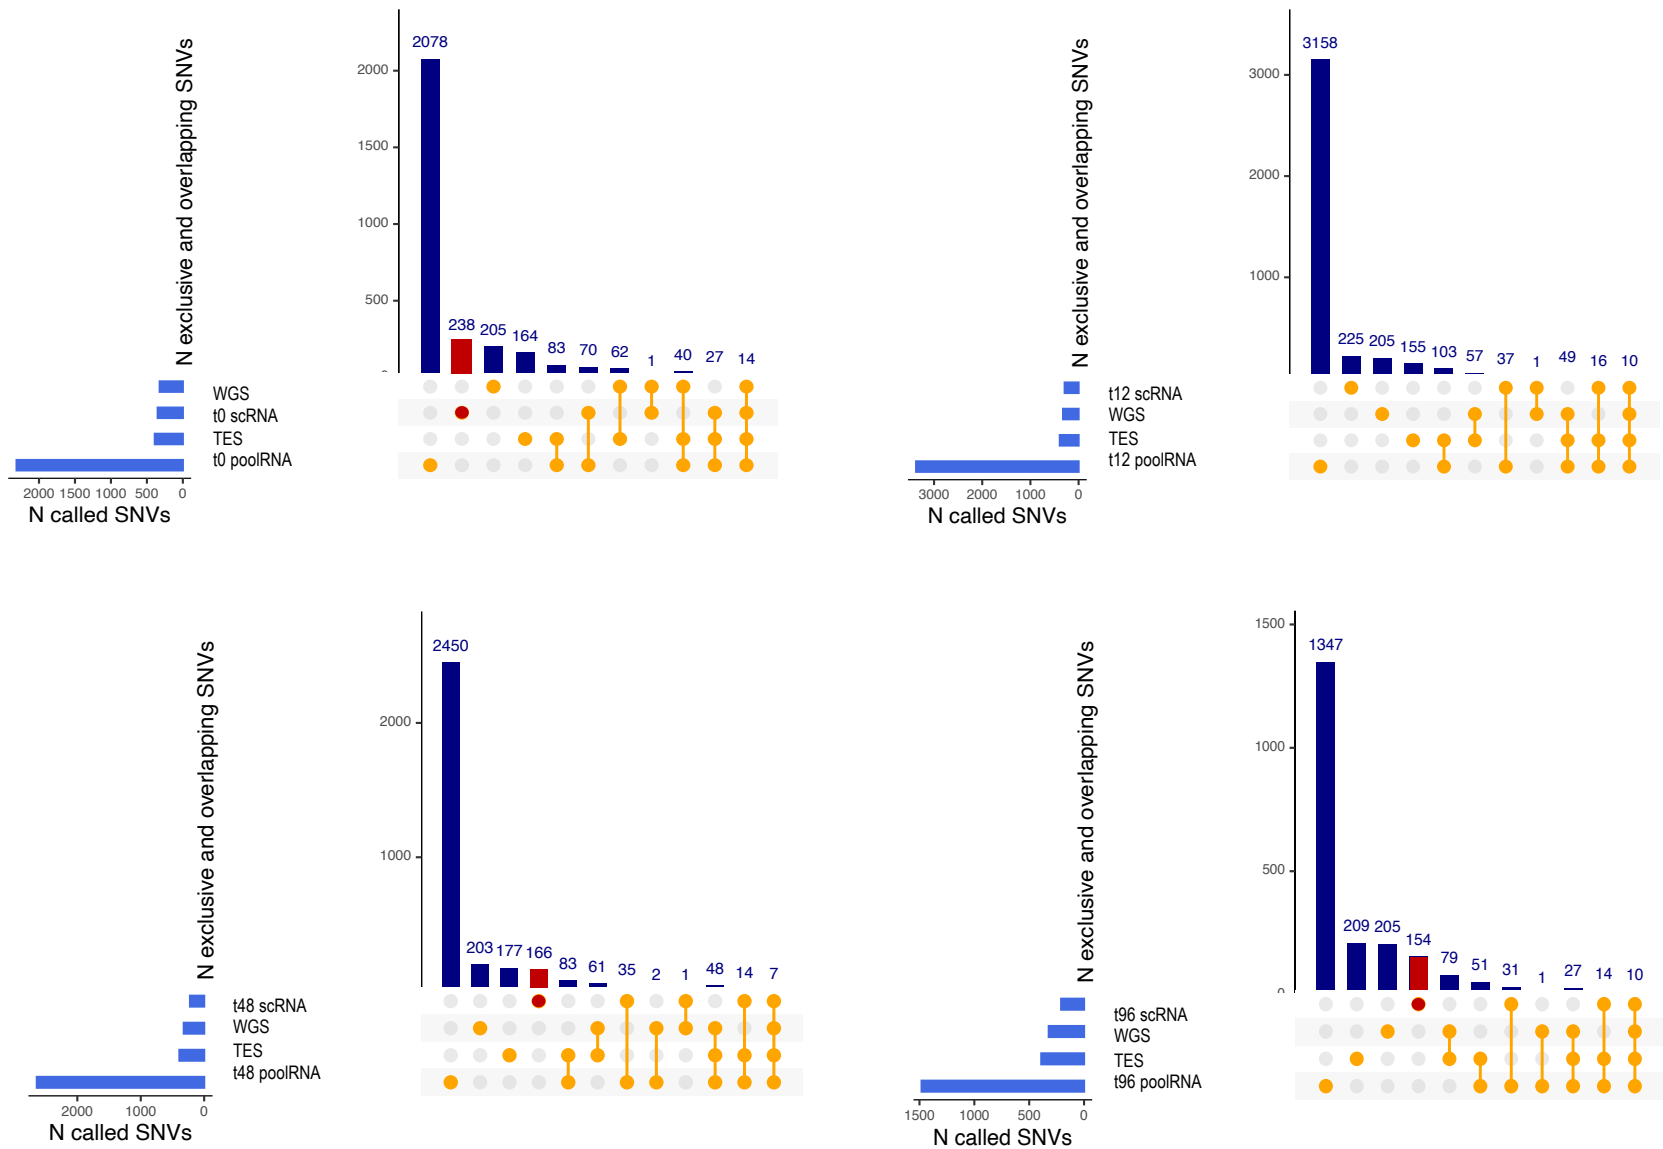

**S\_Figure 1b.** Shared and exclusive SNVs calls across bulk WGS, TES, pooled scRNA-seq and individual cell alignments by Strelka2 in the exons of genes included in the POP. The SNVs called exclusively in the single cell alignments are shown in red.
