# Supplementary material for: Improved SNV discovery in barcode-stratified scRNA-seq alignments
Source: bioRxiv or medRxiv preprint supplement (doi:10.1101/2021.06.12.448184), 2021-06-13
Supplement: Supplementary file [file media-5.pdf]

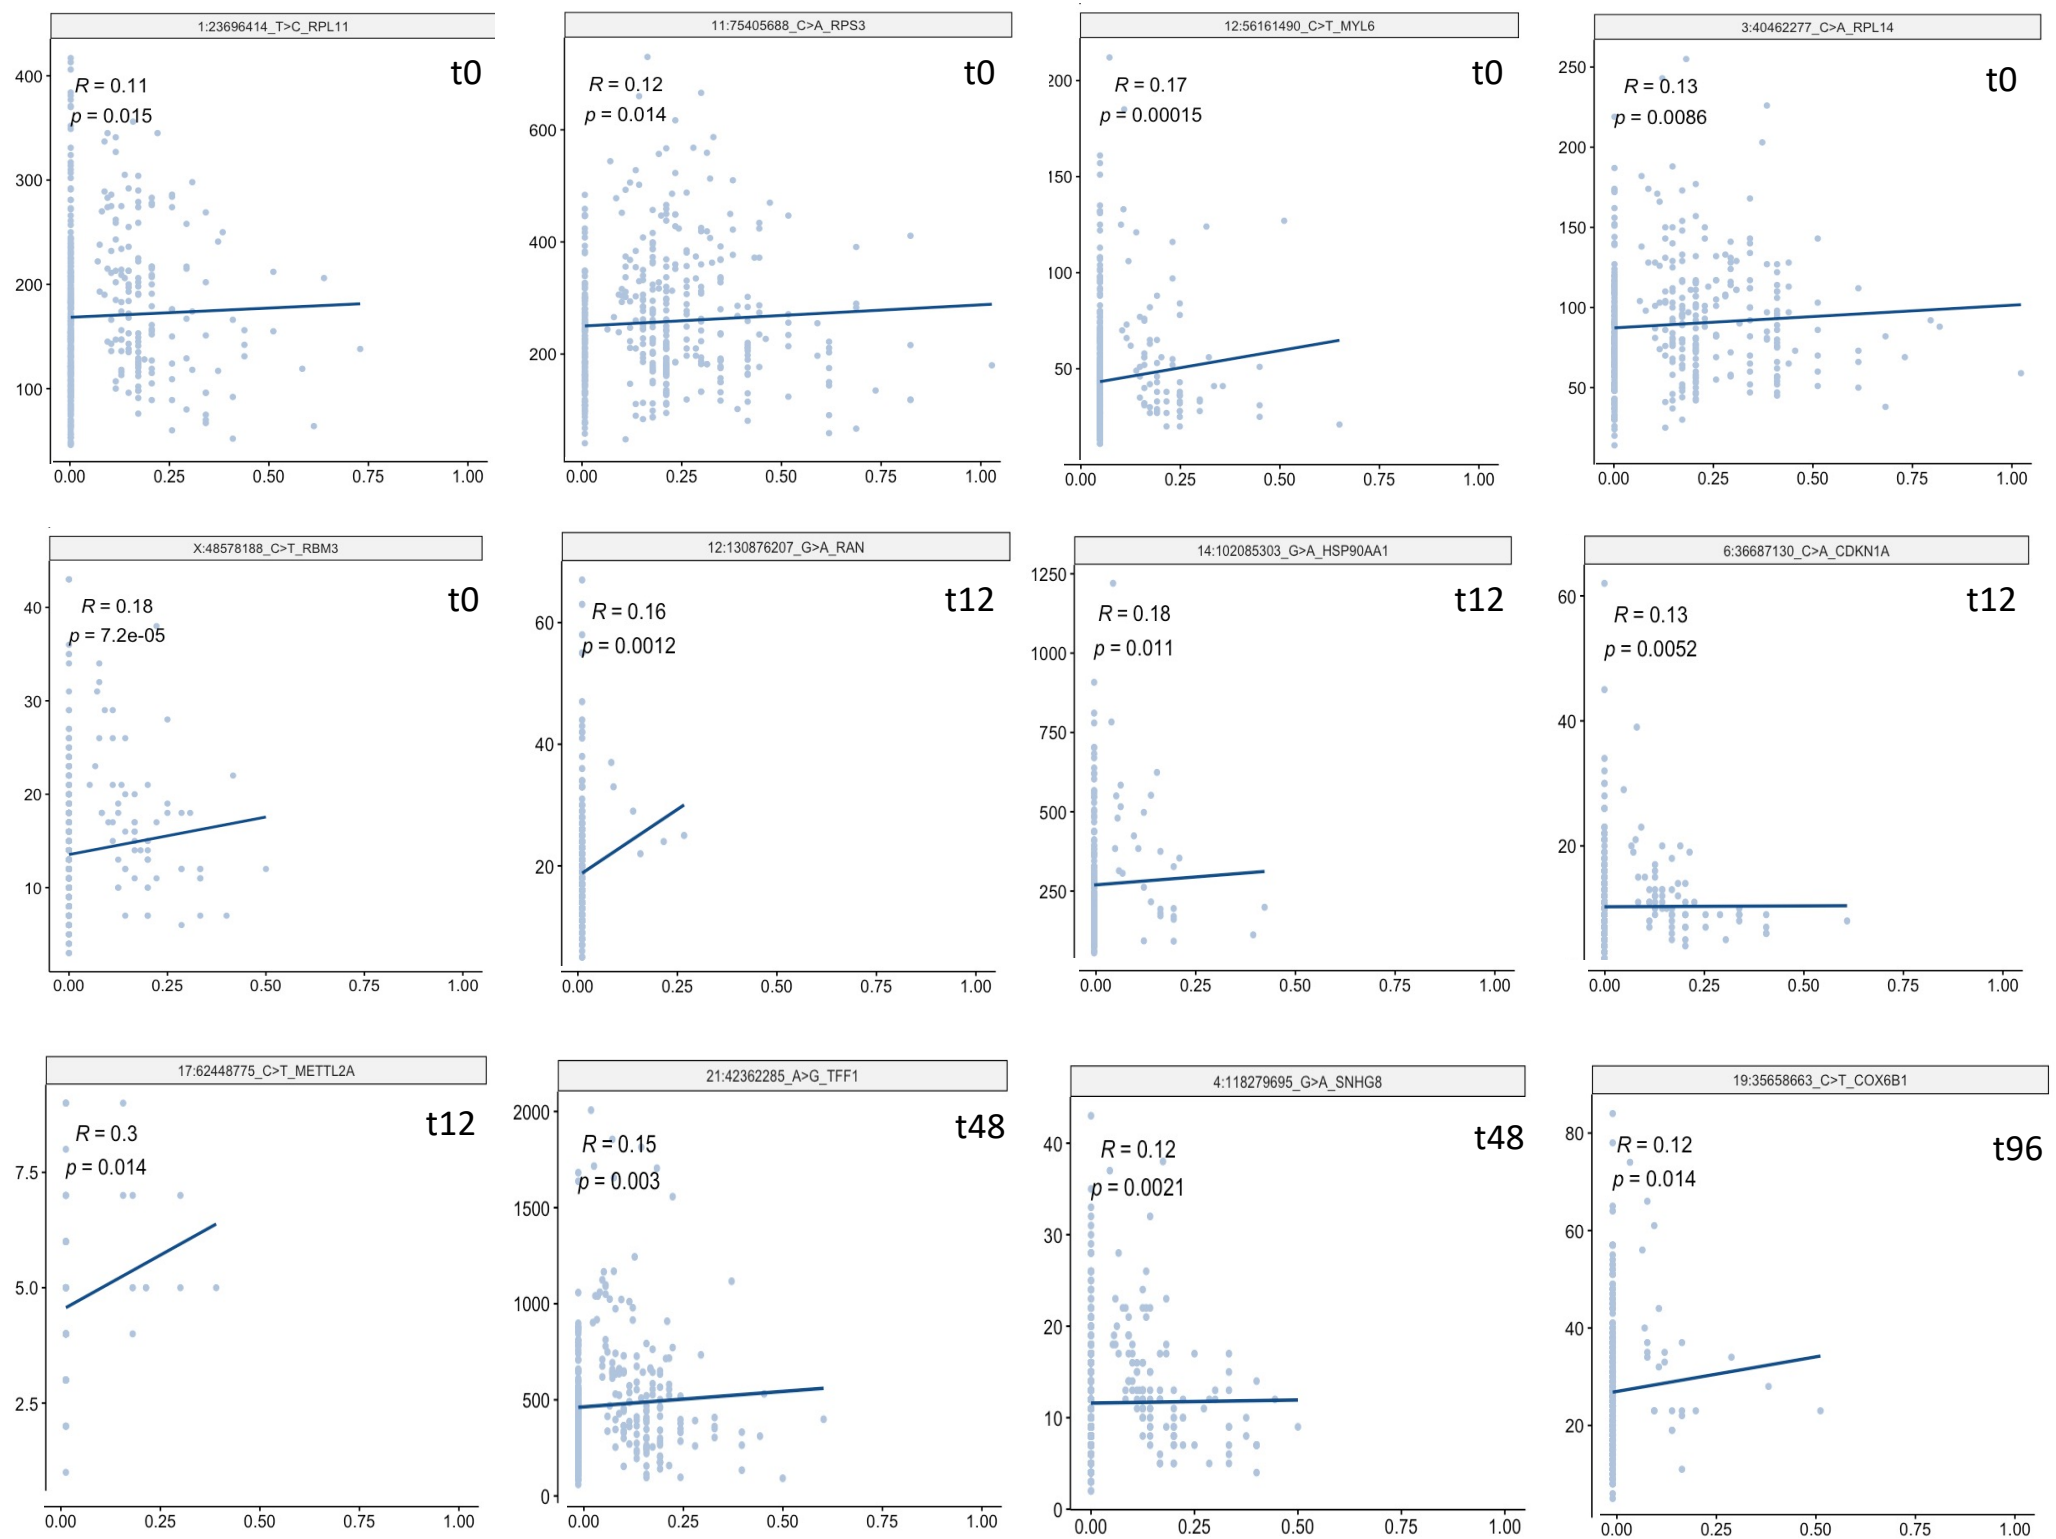

S\_Figure 3 – significant cis-scReQTL between scSNVs and the expression of their harbouring gene.
