# Supplementary material for: Improved SNV discovery in barcode-stratified scRNA-seq alignments
Source: bioRxiv or medRxiv preprint supplement (doi:10.1101/2021.06.12.448184), 2021-06-13
Supplement: Supplementary file [file media-6.pdf]

t0

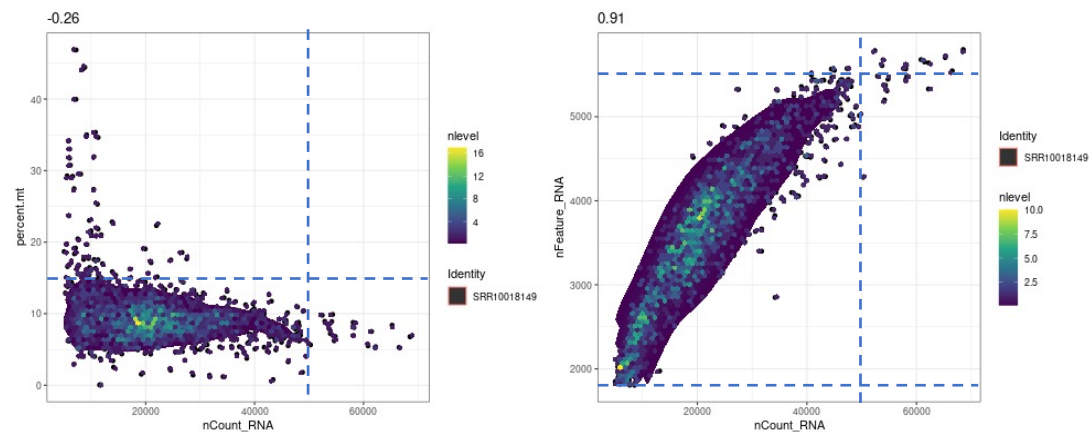

t12

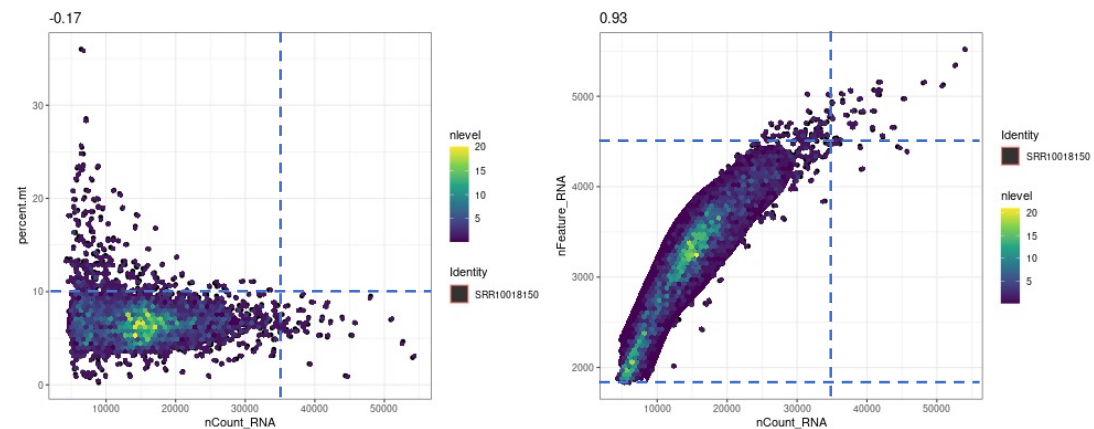

t48

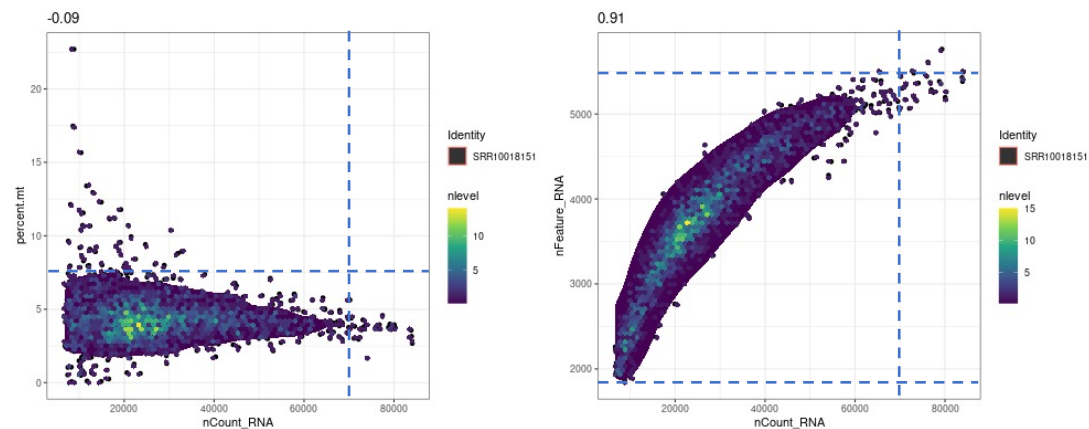

t96

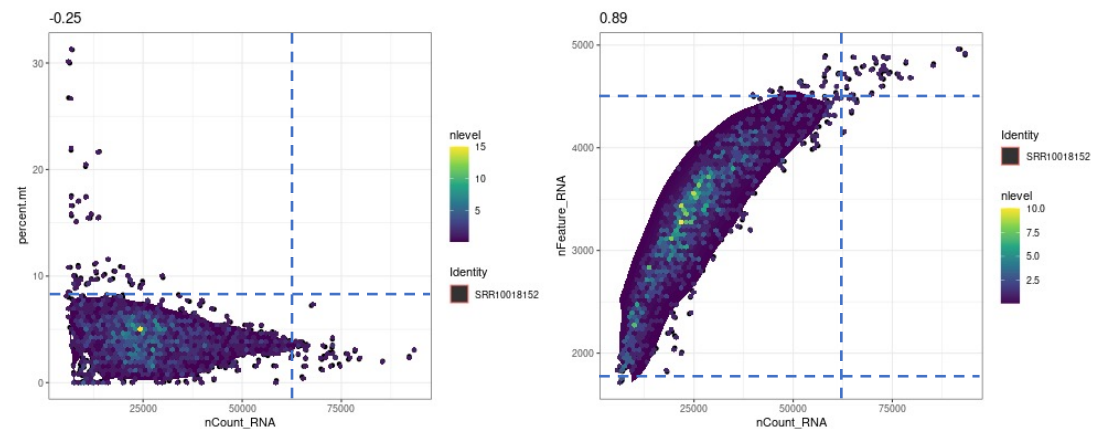

**S\_Figure 4.** Density plots showing the distribution of cells based on proportion of transcripts of mitochondrial origin (left), and number of genes (right) plotted against the counts of sequencing reads in the 4 time-points after MCF7 drug treatment. The dotted line indicates the selected QC thresholds: mitochondrial gene expression above between 7.5 and 15%, and number of genes below 1000 or above between 4500 and 5500.
