# Supplementary material for: Improved SNV discovery in barcode-stratified scRNA-seq alignments
Source: bioRxiv or medRxiv preprint supplement (doi:10.1101/2021.06.12.448184), 2021-06-13
Supplement: Supplementary file [file media-8.pdf]

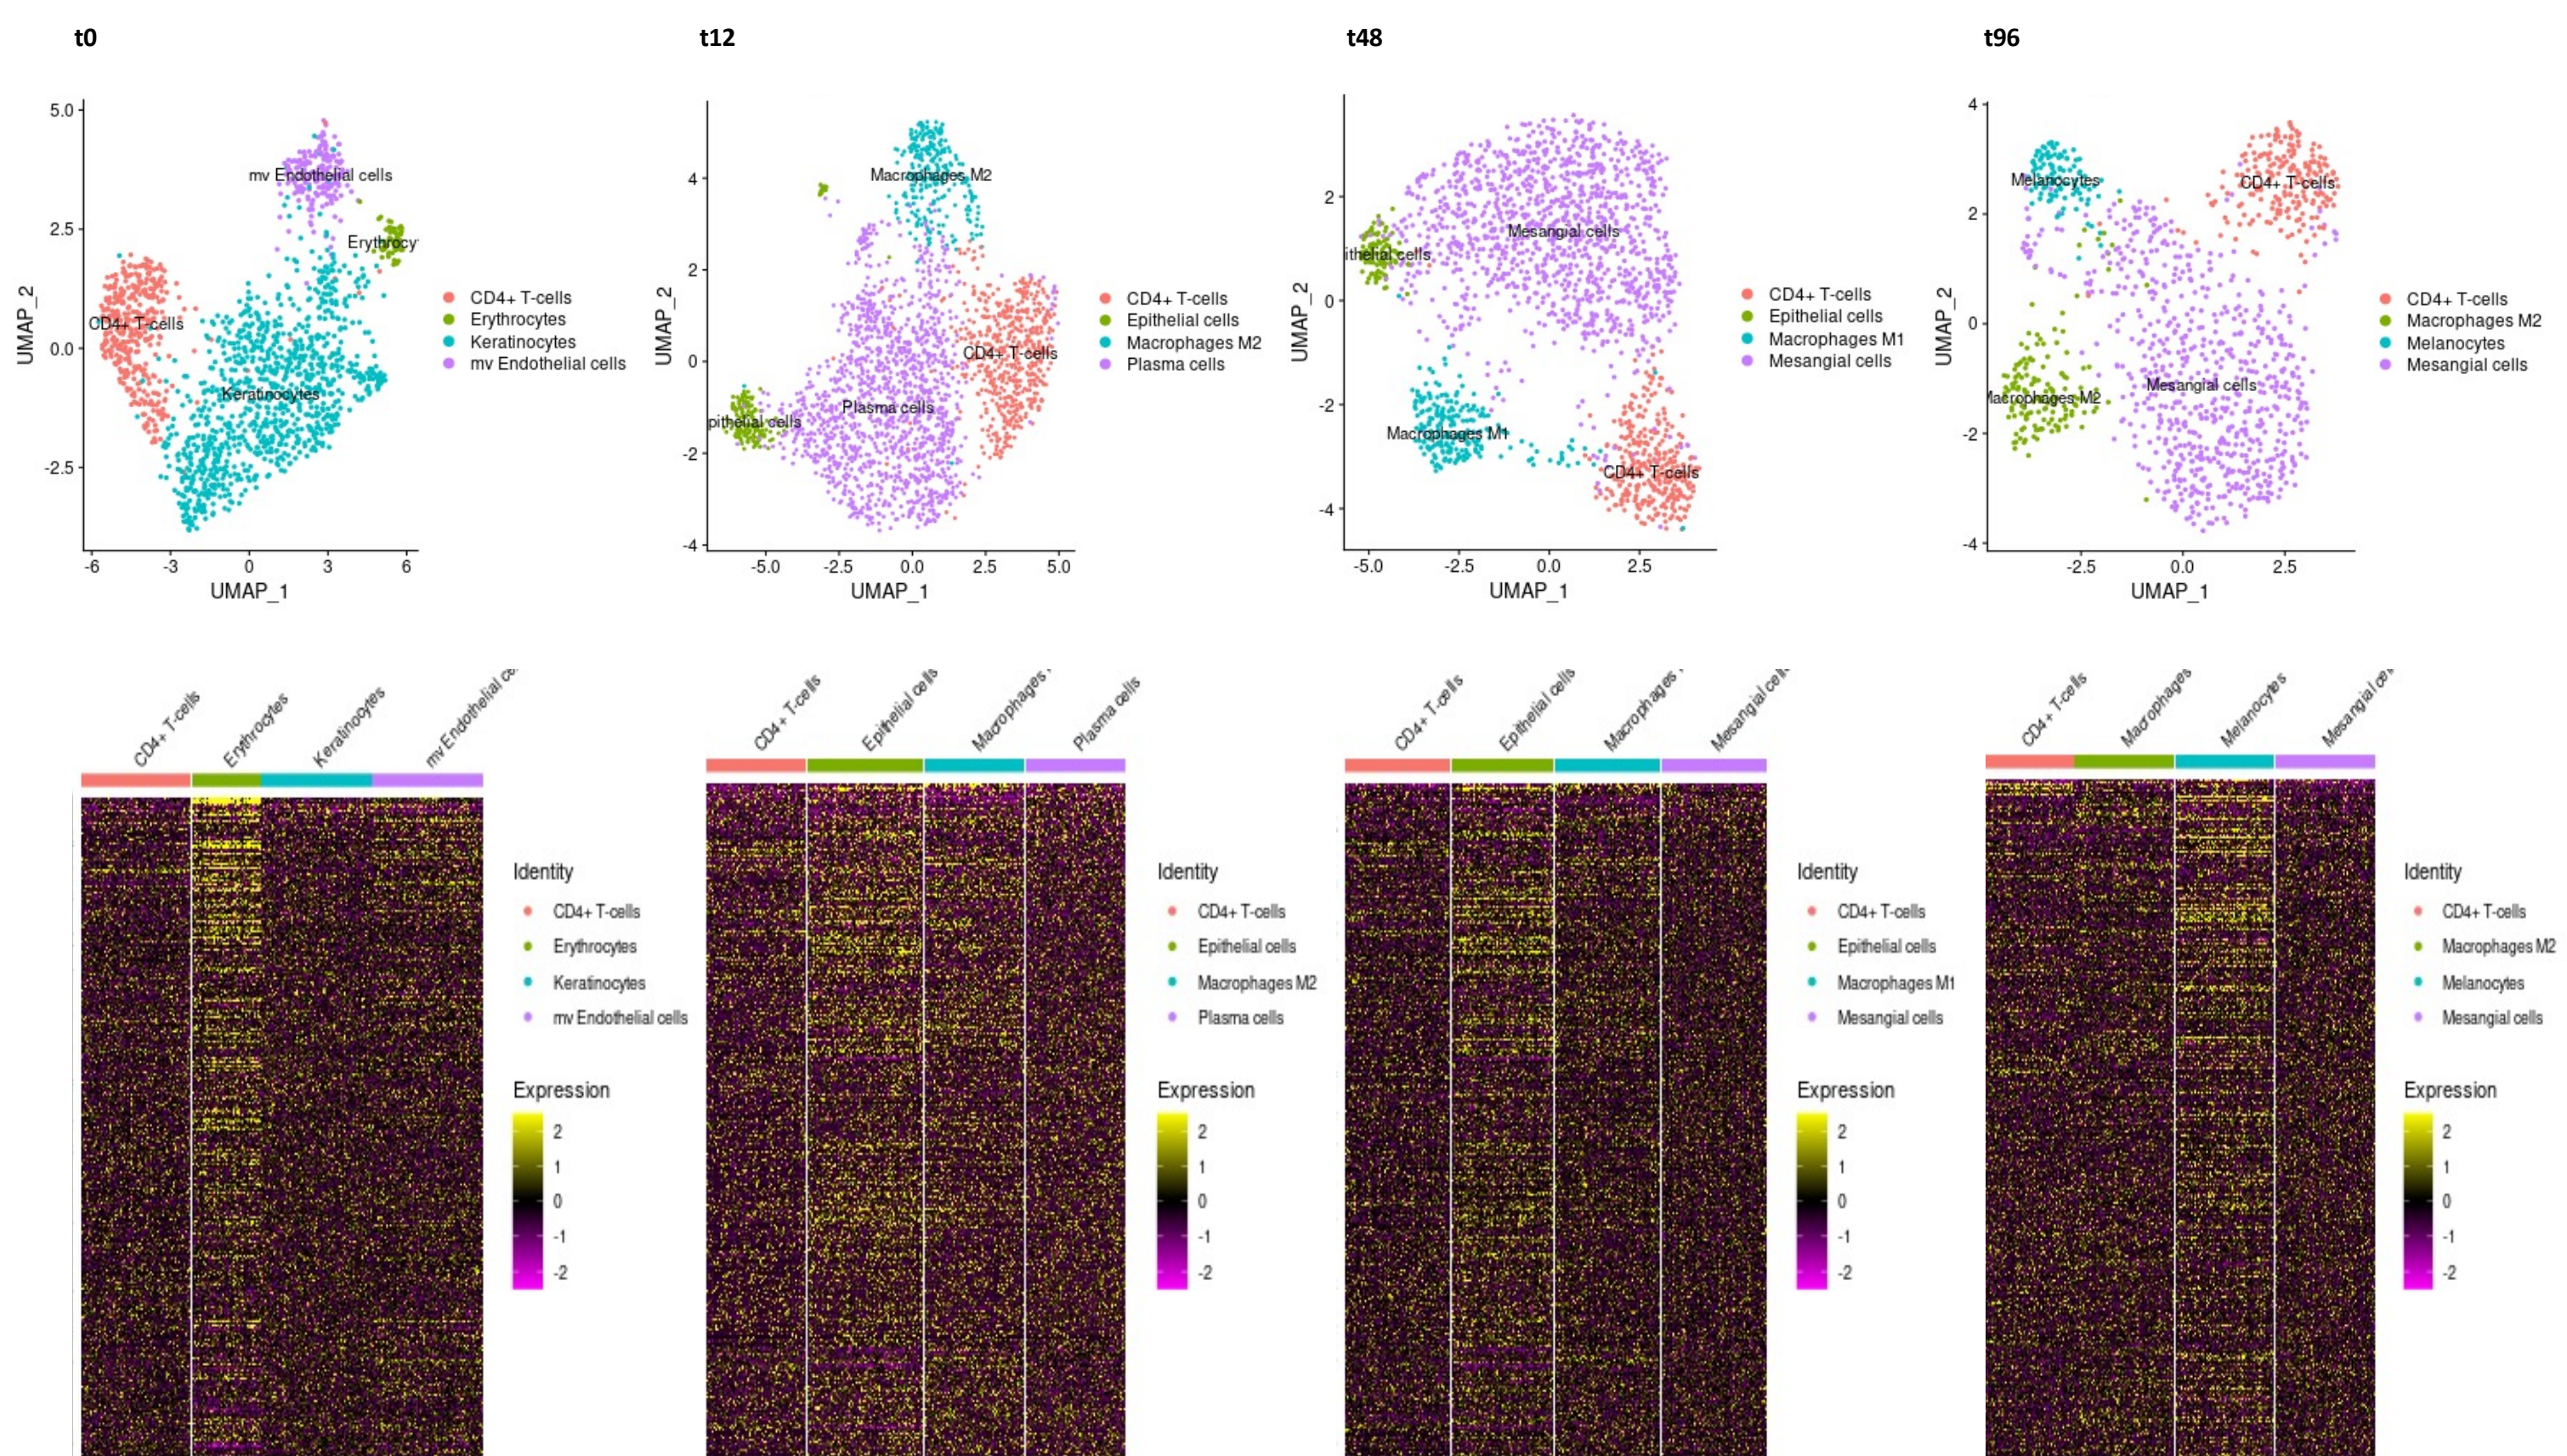

**S\_Figure 6.** SingleR analysis of the data from the 4 time-points after MCF7 drug treatment. Top: SingleR Cluster Labels showing highest similarity with. Across the 4 datasets, cells with gene expression to the following cell types was found: CD4+ T-cells, Epithelial Cells, Macrophages, Endothelial cells, Erythrocytes, Keratinocytes, Plasma cells, and Mesangial cells. Bottom: SingleR gene expression heat maps.
